# Supplementary material for: An Increase in the Levels of Middle Surface Antigen Characterizes Patients Developing HBV-Driven Liver Cancer Despite Prolonged Virological Suppression
Source: MDPI journal article supplement (doi:10.3390/microorganisms9040752), 2021-04-02
Supplement: s1 [file s1]

**Table S1. Ratios of the different HBs forms at T0 in HDV-coinfected patients stratified according to HCC onset**

| <b>Percentages of HBs forms<sup>a</sup></b> | <b>Overall (N=18)</b> | <b>HCC patients (N=6)</b> | <b>no-HCC (N=12)</b> | <b>P-value</b> |
|---------------------------------------------|-----------------------|---------------------------|----------------------|----------------|
| <b>% S-HBs, Median (IQR)</b>                | 90.0 (64.6-95.0)      | 88.8 (63.5-92.3)          | 93 (69.3-95.2)       | 0.6            |
| <b>% M-HBs, Median (IQR)</b>                | 9.9 (5.0-35.0)        | 11.1 (7.6-36.3)           | 6.7 (4.7-30.4)       | 0.3            |
| <b>% L-HBs, Median (IQR)</b>                | 0.04 (0.01-0.26)      | 0.1 (0.03-0.2)            | 0.03 (0.01-0.3)      | 0.4            |

<sup>a</sup> Percentages were calculated as the median (IQR) ratio of each HBs forms respect to the total HBs
